## SHORT COMMUNICATION

# Testing the parasite mass burden effect on alteration of host behaviour in the *Schistocephalus*–stickleback system

Lucie Gréacias, Julie Valentin and Nadia Aubin-Horth\*

**ABSTRACT**

Many parasites with complex life cycles modify the behaviour of their intermediate host, which has been proposed to increase transmission to their definitive host. This behavioural change could result from the parasite actively manipulating its host, but could also be explained by a mechanical effect, where the physical presence of the parasite affects host behaviour. We created an artificial internal parasite using silicone injections in the body cavity to test this mechanical effect hypothesis. We used the *Schistocephalus solidus* and threespine stickleback (*Gasterosteus aculeatus*) system, as this cestode can reach up to 92% of its fish host mass. Our results suggest that the mass burden brought by this macroparasite alone is not sufficient to cause behavioural changes in its host. Furthermore, our results show that wall-hugging (thigmotaxis), a measure of anxiety in vertebrates, is significantly reduced in *Schistocephalus*-infected sticklebacks, unveiling a new altered component of behaviour that may result from manipulation by this macroparasite.

**KEY WORDS:** *Gasterosteus aculeatus*, *Schistocephalus solidus*, Phenotypic engineering, Thigmotaxis, Anxiety, Reversed geotaxis

**INTRODUCTION**

Many parasites have complex life cycles with multiple hosts, and alter various aspects of their host's biology (Poulin, 2010). Infection can be accompanied by changes in morphology, physiology, life history and behaviour of the host (Poulin and Thomas, 1999). Those phenotypic modifications can stem from non-exclusive causes: specific manipulation, side effects (pathological consequences) or by-products, which can be coincidentally beneficial (Thomas et al., 2005). Understanding these mechanisms will shed light on host–parasite interactions and coevolution (Poulin, 2007). However, in most host–parasite systems, the proposed causes of those changes are not tested experimentally (Moore, 1983). This is, in part, because it is technically complicated to do so, as multiple proximal causes may intervene to result in these altered host phenotypes (Gréacias et al., 2017).

In host–parasite systems where the parasite infects its host internally, the presence of this foreign body could cause modification in the host phenotype, including its behaviour. The parasite's 'mechanical effect' can be defined as all effects induced merely by the physical presence of the parasite or its movements that have consequences on host phenotype in the time window in which they are exerted by the parasite. For example, the metacercariae of

the *Tylodelphys* trematode infect the vitreous humour of the eyes of its fish host (Stumbo and Poulin, 2016). The parasite is not encysted and can cross from one side of the eye to the other. This trematode shows a daily rhythm of movement within the eye, obstructing the host retina during the day when its final fish-eating bird host is active, while leaving the eye fully functional at dusk and night. Thus, a mechanical effect and parasite behaviour act together to modify host behaviour. Another example of a manipulative parasite that might change its host behaviour by these two mechanisms is the trematode *Leucochloridium paradoxum*, which forms broodsacs that migrate to the tentacles of terrestrial snails where they then pulsate rapidly. As a result of the presence and behaviour of this parasite, the snails' eye stalks resemble caterpillars, causing increased predation by the definitive bird host (Wesołowska and Wesołowski, 2014). In both cases, the parasite's behaviour (circadian movement in the eye, migration to eye stalk and pulsation) is coupled with the effect of its physical presence on host phenotype, but it is conceivable that the presence of the parasite alone could also affect its host.

In some cases, the mass of the internal parasite approaches the mass of its host (Arme and Owen, 1967). The threespine stickleback (*Gasterosteus aculeatus*) can be infected by a tapeworm, *Schistocephalus solidus*. This macro parasite can attain 40% of the host weight and, as multiple infections are common, combined worms can weigh up to 92% of the host weight (Hopkins and Smyth, 1951). The space taken by the parasite in the body cavity of the host could have major impact on the fish physiology. Growth of visceral organs is restricted because of the lack of space (Pascoe and Matthey, 1977; Walkey and Meakins, 1970). The stomach's capacity for expansion may thus be limited in heavy infections (Milinski, 1985), potentially resulting in a decrease in food intake (Wright et al., 2006). The fish's abdomen becomes grossly distorted as the parasite grows inside it (Arme and Owen, 1967) and this may make sticklebacks more vulnerable to predatory birds that select the largest available fish from the population (Van der Veer et al., 1997). *S. solidus* might also alter the buoyancy of its fish host, as the density of the cestode is higher than that of the stickleback (LoBue and Bell, 1993). This means that the host must use its swim bladder to reach higher buoyancy despite the parasite mass (Talarico et al., 2017). Concurrently with morphological changes, a suite of behaviours is changed in sticklebacks harbouring at least one infective parasite. The fish show more-risky behaviours: they lose their anti-predator response and forage at a higher rate, even under the risk of predation (Milinski, 1985; Giles, 1987; Godin and Sproul, 1988; Barber et al., 2004; Tierney et al., 1993). They also spend less time swimming with a group when satiated compared with uninfected fish (Barber et al., 1995, 1998). Moreover, infected fish tend to stay at the water surface both in nature and in the laboratory, unlike healthy sticklebacks (they show 'reversed geotaxis'; LoBue and Bell, 1993; Quinn et al., 2012). Studies on host manipulation have aimed to unravel the most plausible cause of

Département de Biologie et Institut de Biologie Intégrative et des Systèmes (IBIS), Université Laval, Québec, Canada G1V 0A6.

\*Author for correspondence (Nadia.Aubin-Horth@bio.ulaval.ca)

 N.A., 0000-0002-9030-634X

Received 22 November 2017; Accepted 31 January 2018

host behaviour modification through manipulation of the neuroendocrine state of infected sticklebacks (Gréciás et al., 2017) or by directly measuring monoamine levels in parasitized sticklebacks compared with healthy fish (Øverli et al., 2001). Bioinformatics and genomics studies have also shown that certain *S. solidus* proteins (such as Wnt4, known for its role in signal transduction in other systems) proposed to mimic the stickleback proteins, are expressed at the infective stage in *S. solidus* (Hébert et al., 2015, 2017). However, to our knowledge, no study has tested the mechanical effect hypothesis of host alteration by a parasite using an experimental approach, in this system or another.

The aim of this study was to assess the impact of a parasite mass burden on the behaviour of its host in order to test whether there is a causal link between the parasite ‘mechanical effect’ and behaviour alteration in the stickleback–cestode system. We used phenotypic engineering, the experimental modification of an organismic phenotype, as it allows us to separate a complex phenotype into its parts and focus on the effects of a single trait (Kliman, 2016), which enables the testing of predictions in a specific manner (Andersson, 1992; Aubret et al., 2003). We manipulated the space available in the body cavity of the fish by injecting an artificial silicone ‘worm’ that is inert but similar in physical property to a live parasite, allowing isolation of the mechanical effect of *Schistocephalus* on its host. We quantified four different behaviours: reversed geotaxis (tendency to use the top of the water column); response to a predator; feeding; and thigmotaxis (wall-hugging tendency). We predicted that sticklebacks harbouring an artificial worm would increase the time they spend swimming at the surface (reversed geotaxis) because of their buoyancy, as infected sticklebacks do. We also predicted that the sticklebacks harbouring an artificial worm would decrease their latency to start feeding, to freeze after an attack (they would freeze immediately instead of displaying a typical fleeing anti-predator response, because of an impairment in locomotion) and to resume moving. Finally, we measured a behaviour not previously quantified in infected sticklebacks, the tendency to avoid exposure to potential threats by hugging walls in an open field (thigmotaxis or centrophobic behaviour). This behaviour is used as a measure of anxiety in mammals, fish and insects (Maximino et al., 2010; Webster and Laland, 2015; Mohammad et al., 2016) and has been observed in other infected hosts (Poulin, 2001). We predicted that infected sticklebacks would have a low thigmotaxis (they would spend less time near the walls of the aquarium and more time in the centre) and that sticklebacks harbouring artificial worms would have the same behaviour.

## MATERIALS AND METHODS

### Animals

We caught *Gasterosteus aculeatus* Linnaeus 1758 juveniles ( $n=40$ ) from Lac Témiscouata (47°40′33″N 68°50′15″O, Québec, Canada, August 2015). Fish were maintained (1–2 fish per 2 litres) under a 12 h:12 h light:dark cycle mimicking the photoperiod variation at the latitude of their environment of origin (Québec City, Québec, Canada) and a water temperature of 15°C for 10 months before behavioural testing. Fish were fed every morning with a mix of blood worms and *Artemia*. All work was carried out in compliance with Animal Care and Use Guidelines, under a permit of the Comité de Protection des Animaux de l’Université Laval (CPAUL, permit 2014-069-3).

### Experimental treatments

To evaluate the influence of parasite presence on fish behaviour, we implanted an artificial worm in uninfected sticklebacks. We used an

injection of silicone (Mold Star 16 Fast, Smooth-On Inc.) to simulate the presence of the parasite in the body cavity of its host. The use of silicone is non-toxic and common in endocrinology studies (see Ros et al., 2012). This specific type of silicone was selected for its similarity in density to *Schistocephalus solidus* Müller 1776 (see Fig. S1 for a direct comparison). To replicate the mass of the parasite, we injected 80 µl of silicone per injection every 2 days on three occasions (see below) to achieve a 150 mg mass. In parallel, to discriminate the effect of the exposure to silicone only on behaviour from the effect of the volume of the artificial worm, we injected a small amount of silicone to a separate group of fish used as controls (15 µl/injection, for a total mass of 30 mg), also every 2 days on three occasions.

We had four experimental treatments: silicone artificial parasite (80 µl of silicone/injection,  $n=15$ ), silicone control (15 µl of silicone/injection,  $n=14$ ), infected fish (infected with *S. solidus*,  $n=5$ ) and control fish (no material injected,  $n=6$ ). Infected and control fish were handled in the same way as other groups, but instead of injecting them with silicone, we only inserted the needle into their body cavity. We determined the infection status of parasite-infected individuals at the end of the experiment by dissection.

Fish were isolated in a 2 l tank at the start of the experiment (day 1). We assigned them randomly to a treatment for the rest of the experiment. Fish were fed every day, except on the day before the behavioural tests. Fish were handled every 2 days. During the first week (control week), we handled the fish to recreate the experimental manipulation, but without any injection (day 1, 3 and 5). Fish were taken out of the tank, held in a moist sponge on their back to have easy access to the body cavity. At the end of the control week (day 7), we assessed their behaviour (see ‘Behavioural experiments’ below) and placed them back in their tank where they were fed. The second week (engineering week) started on day 8. Handling procedure was the same, but we injected the fish according to their treatment (day 8, 10 and 12). At the end of the engineering week (day 14), we assessed the same behaviours. On day 15, we killed the fish by anesthesia (tricaine methanesulfate, 75 mg l<sup>-1</sup>, pH 7.5, Sigma-Aldrich) followed by cervical transection. Total length (6.6±0.59 cm), mass (1.6±0.84 g), sex, and the presence of a parasite were noted [a single infective plerocercoid (>50 mg) was found inside the body cavity of each infected stickleback].

### Behavioural experiments

Two cameras (on the top and side of the aquarium) recorded all behavioural trials in the test aquarium (30×90×30 cm, width×length×depth; 20 cm of water depth). At the start of the experiment, an isolated focal fish was placed inside an opaque container (500 ml), which was placed horizontally in the behavioural test tank. As soon as the fish exited the container (or after 150 s), the container was taken out of the aquarium and the behavioural trial started. The first 30 s after the container removal were not used because of the water movement due to its removal.

To measure thigmotaxis, latency to enter the centre of the tank and time spent in the centre of the tank (at more than 5 cm of the edge of the aquarium) were analysed for 120 s. To measure geotaxis, the time spent near the surface (in the 10 cm upper zone) was also quantified during this 120 s period. Latency to feed was measured immediately after the preceding measurements, the fish was fed with blood worms released in the water using a plastic pipette (within 5 cm of the fish’s head). Food was released in front of the fish to ensure it was detected in all trials. Latency to feed was quantified for up to a maximum of 150 s.

Response to a predator was measured as soon as the fish had fed (or after 150 s). We attacked the fish (within 5 cm of the fish head) with an artificial heron head (only the beak penetrated the water, 10–15 cm) to simulate a predator attack. We quantified the time taken to freeze after the attack, and the time spent frozen until activity was resumed, up to 150 s.

### Behavioural and statistical analysis

Latency to enter the centre and time spent in the centre of the tank, as well as time spent near the water surface were analysed using an automatic tracking module in Ethovision software (Ethovision XT 11.5, Noldus Information Technology, Wageningen, The Netherlands; Noldus et al., 2001). Latency to feed, latency to freeze after a predator attack and latency to resume activity after the attack were analysed by hand. All analyses were done blind to treatment. The complete dataset is available in the supplementary material (Dataset 1).

We performed all statistical analyses in R software version 3.0.2 (R Foundation for Statistical Computing, Vienna, Austria). We conducted analyses of variance on aligned rank transformed data with the package ‘ARTool’ (Wobbrock et al., 2011). Data were aligned and rank transformed and a nonparametric ANOVA test was used. Individuals, weeks and treatments and their interaction (treatment×week) were added to the statistical model. To account for variation in behaviour between individual sticklebacks even before any manipulation, we included tank, mass, length and sex of the fish along with the parasite mass as fixed effects, and fish ID as a random effect (for repeated measurements). We checked the effect of tank, mass, length, sex, parasite mass with visual validation of multiple PCAs and no effects (clusters) were found on any

behaviour. We then excluded those factors from the model. Finally, we did a *post hoc* pair-wise comparison with the package ‘lsmeansLT’ (Lenth, 2016) which reports *P*-values that are Tukey-corrected for multiple comparisons. We report significant differences in these *post hoc* tests.

### RESULTS AND DISCUSSION

Infection-associated changes in host behaviour can be explained as direct manipulation by the parasite that facilitates life cycle completion, often by increasing transmission rates to the final host. However, there are alternative explanations for these observations that do not necessarily invoke any active manipulation. We designed the experiment to test the impact of the parasite mass burden on stickleback behaviour and to compare it with the effect of an *S. solidus* infection using an artificial worm. Contrary to our predictions, phenotypically manipulated individuals with an artificial worm mass did not show similar behavioural responses to infected ones. In fact, the largest difference we quantified between treatments was between infected fish and fish injected with an artificial worm. Infected fish spent more time performing risky behaviour whereas behaviour of fish implanted with an artificial worm did not differ from that of control fish. Thigmotaxis was different between infected and phenotypically engineered fish: infected fish spent significantly more time in the centre of the tank than either fish with an artificial parasite ( $P=0.007$ ) or those used a silicone controls ( $P=0.039$ ) (Fig. 1A, Tables S1 and S2). Infected fish also had a shorter latency to enter the centre of the test tank than the artificial parasite-implanted fish, but this difference was not significant (*post hoc* test,  $P=0.055$ )

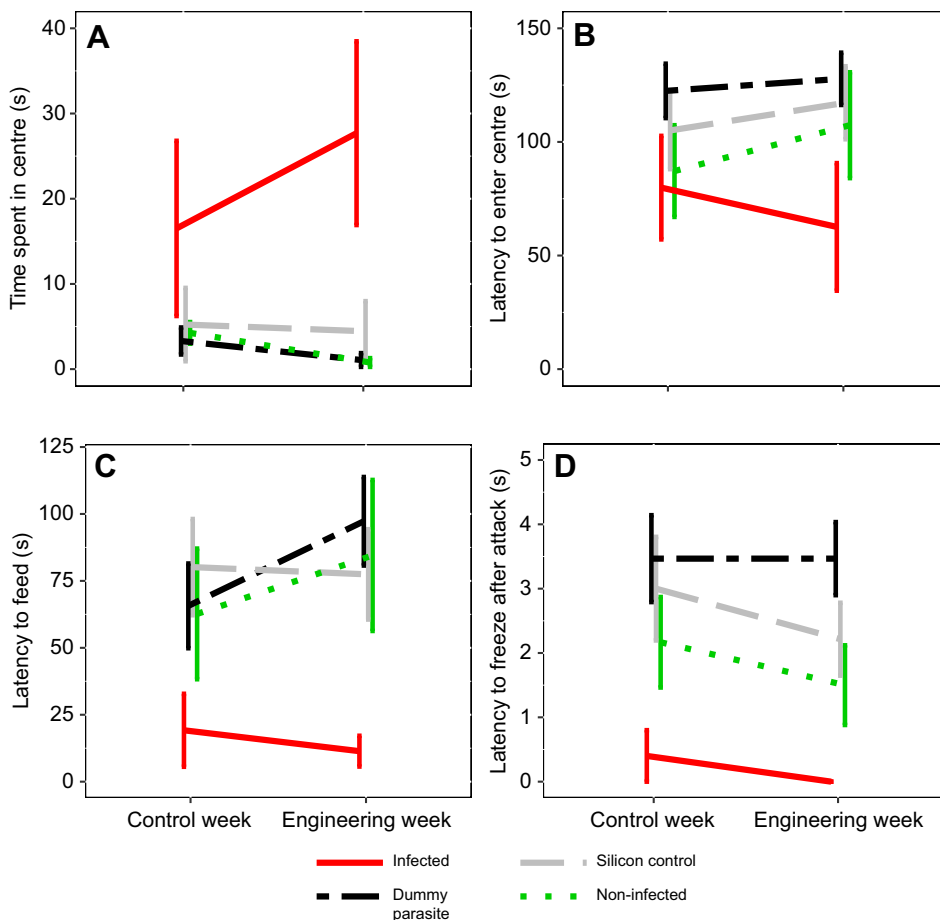

**Fig. 1. Phenotypic engineering with an artificial worm does not recreate the behaviour of a *S. solidus*-infected fish.**

Infected fish spent more time performing risky behaviours while fish implanted with an artificial worm did not differ from control fish. Average behavioural response and standard error are presented for each experimental treatment (artificial parasite, infected fish, silicone control and control fish) and week of treatment (control week and engineering week). (A) Thigmotaxis, time spent in the centre of the tank. (B) Latency to enter the centre of the tank. (C) Latency to feed. (D) Latency to freeze after an attack. Dummy parasite,  $n=15$ ; infected,  $n=5$ ; silicone control,  $n=14$ ; non-infected,  $n=6$ .

(Fig. 1B, Tables S1 and S2). Geotaxis was not affected: there were no differences in the time spent in the upper part of the aquarium across any of the treatments (Fig. S2, Tables S1 and S2). Feeding also differed between groups: infected fish had a significantly shorter latency to feed than fish with the artificial worm ( $P=0.022$ ) and fish used as silicone controls ( $P=0.031$ ) (Fig. 1C, Tables S1 and S2). Furthermore, infected fish had a shorter latency to freeze after a predator attack than the artificial parasite-implanted fish ( $P=0.0003$ ) and the fish injected with a small amount of silicone ( $P=0.008$ ) (Fig. 1D, Tables S1 and S2). There were no significant differences in the time spent frozen after an attack across any of the treatments (Fig. S3, Table S1). Our results show that the experimental behavioural tests were appropriate to detect the previously described changes in behaviour in infected fish, but that the phenotypic engineering approach using silicone injections did not result in the predicted behavioural changes. Our results also show that thigmotaxis (wall hugging, a measure of anxiety in several vertebrates) is significantly lowered in infected sticklebacks, a behaviour change not previously reported for this system, but one that can be reliably quantified and used in future studies.

This study was the first to test a strictly mechanical effect hypothesis to explain behavioural alteration in a parasitized host. Our results suggest that the space taken by a *Schistocephalus* worm at its infective stage when behavioural modifications are usually measured is not the cause of the behavioural changes in its host, at least not in isolation. Indeed, *S. solidus* is alive in the body cavity of its host, and hence is not only a mass burden but is also moving and can impact fish physiology, especially that of the digestive tract, when moving between organs. We did not try to reproduce the movement of the parasite in the body cavity of its host as a cause of behavioural modification. Therefore, the ‘parasite behaviour’ component of the mechanical effect hypothesis remains to be tested alone and in combination with other causes such as the immune response, hunger or neuromodulation (Gréacias et al., 2017). Even though we did not measure significant differences in behaviour between the two volumes of silicone treatments used, we suggest that the treatment where a small amount of material is injected is an essential control in phenotypic engineering studies that aim to mimic the mass of a parasite with inert substances.

Sticklebacks captured during the day near the surface of a lake have a greater likelihood of being infected with *S. solidus* and have larger parasites than infected fish caught at the surface only at night (Quinn et al., 2012). Furthermore, in the laboratory, infected sticklebacks spend significantly more time foraging in the upper part of an experimental tank than control fish do (Talarico et al., 2017). However, contrary to our prediction, we did not find significant differences in time spent at the surface between groups (Fig. S2). In a previous laboratory experiment, we tested if individuals prefer to swim in shallow waters versus in the deeper part of a tank and showed variation among treatments and also among individuals from a given treatment (Gréacias et al., 2017). We expected that allowing individuals to use the full water column (rather than giving them a binary choice) would result in a better discrimination of geotaxis, but it proved not to be the case in the experimental set-up we used, which was much shallower than that used by Talarico et al. (2017) (20 cm water depth in the present study versus 50 cm). As a cautionary note, we only had five infected fish available for the experiment, which limited our statistical power to detect a geotaxis tendency if this behaviour is more variable among individuals. Furthermore, we did not use experimental infections but rather relied on fish infected in the wild. Another study showed no differences in the water column position at which

parasitized and healthy sticklebacks were caught, and propose that buoyancy problems may increase with larger parasite mass, but that the worms do not usually attain this mass in the wild because its host is predated earlier (Ness and Foster, 1999). In freshwater fish, the swim bladder constitutes 7% of the body volume (Fänge, 1983). While it has been reported that there is no significant reduction in swim bladder size of infected fish (Arme and Owen, 1967), it would be interesting to analyse not only the space taken by the parasite as in the present study, but also its impact on the swim bladder, as previously suggested by Meakins and Walkey (1975).

Thigmotaxis was lower in infected sticklebacks, as they swam readily in the centre of the tank, which could reflect lower anxiety brought about directly or indirectly by the *Schistocephalus* infection. Thigmotaxis has been previously measured in wild healthy ninespine sticklebacks (*Pungitius pungitius*), a closely related species to threespine sticklebacks, and has been shown to be consistent when measured more than once on the same individual (Webster and Laland, 2015). Wall-hugging ninespine sticklebacks (with high thigmotaxis) also showed lower activity and a higher latency to explore a new environment (Webster and Laland, 2015). In zebrafish, avoidance behaviour measured as thigmotaxis is used to assess anxiety level and can be reduced using anxiety-lowering drugs or ethanol exposure (Maximino et al., 2010). The quantitative assay we used in this study could thus be used in future studies of the mechanistic proximal causes of behavioural alteration in *Schistocephalus*-infected sticklebacks. Additional investigation into altering the anxiety levels of these infected individuals is warranted.

Modification of host behaviour by parasites is a fascinating but controversial phenomenon, since it is often difficult to disentangle whether it is an adaptation of the parasite or simply a side-effect of the infection that has no fitness consequence for either the host or the parasite (Thomas et al., 2005). Our findings suggest that the use of silicone might not be the correct substitute to recreate the parasitic mass of *S. solidus*. We thus cannot conclude or reject that the mechanical hypothesis is a possible cause of behaviour modification by a parasite. However, the general approach of using phenotypic engineering to create artificial parasites is a potentially fruitful avenue to dissect the proximal causes of parasitic manipulation.

#### Acknowledgements

We thank the LARSA employees for help with the fish rearing and Sergio Cortez Ghio for help with statistical analysis. We thank Katie Piechel, Jacques Brodeur, Christian Landry and Julie Turgeon for discussions that led to this project. Chloé Berger and Verónica Alves provided comments on a previous version of this manuscript. The data in this manuscript forms part of the PhD thesis of Lucie Gréacias (Université Laval, 2017).

#### Competing interests

The authors declare no competing or financial interests.

#### Author contributions

Conceptualization: L.G., N.A.-H.; Methodology: L.G., N.A.-H.; Formal analysis: L.G., J.V.; Writing - original draft: L.G., N.A.-H.; Writing - review & editing: L.G., J.V., N.A.-H.; Visualization: L.G.; Supervision: N.A.-H.; Project administration: N.A.-H.; Funding acquisition: N.A.-H.

#### Funding

This study was funded through a Fonds de Recherche du Québec - Nature et Technologies (FRQ-NT) Programme de Recherche en Équipe grant to N.A.-H. and a Natural Sciences and Engineering Research Council of Canada (CRSNG) grant through the Discovery grant program to N.A.-H.

#### Data availability

The complete dataset is available in the supplementary information as Dataset 1.

## Supplementary information

Supplementary information available online at  
<http://jeb.biologists.org/lookup/doi/10.1242/jeb.174748.supplemental>

## References

- Andersson, S. (1992). Female preference for long tails in lekking Jackson's widowbirds: experimental evidence. *Anim. Behav.* **43**, 379-388.
- Arme, C. and Owen, R. W. (1967). Infections of the three-spined stickleback, *Gasterosteus aculeatus* L., with the plerocercoid larvae of *Schistocephalus solidus* (Müller, 1776), with special reference to pathological effects. *Parasitology* **57**, 301-314.
- Aubret, F., Bonnet, X., Shine, R. and Maumelat, S. (2003). Clutch size manipulation, hatching success and offspring phenotype in the ball python (*Python regius*). *Biol. J. Linn. Soc.* **78**, 263-272.
- Barber, B., Huntingford, F. A. and Crompton, D. W. T. (1995). The effect of hunger and cestode parasitism on the shoaling decisions of small freshwater fish. *J. Fish Biol.* **47**, 524-536.
- Barber, I., Downey, L. C. and Braithwaite, V. A. (1998). Parasitism, oddity and the mechanism of shoal choice. *J. Fish Biol.* **53**, 1365-1368.
- Barber, I., Walker, P. and Svensson, P. A. (2004). Behavioural responses to simulated avian predation in female three spined sticklebacks: the effect of experimental *Schistocephalus solidus* infections. *Behaviour* **141**, 1425-1440.
- Fänge, R. (1983). Gas exchange in fish swim bladder. *Rev. Physiol. Biochem. Pharmacol.* **97**, 111-158.
- Giles, N. (1987). Predation risk and reduced foraging activity in fish: experiments with parasitized and non-parasitized three-spined sticklebacks, *Gasterosteus aculeatus* L. *J. Fish Biol.* **31**, 37-44.
- Godin, J.-G. J. and Sproul, C. D. (1988). Risk taking in parasitized sticklebacks under threat of predation: effects of energetic need and food availability. *Can. J. Zool.* **66**, 2360-2367.
- Gréacias, L., Hébert, F. O., Berger, C. S., Barber, I. and Aubin-Horth, N. (2017). Can the behaviour of threespine stickleback parasitized with *Schistocephalus solidus* be replicated by manipulating host physiology? *J. Exp. Biol.* **220**, 237-246.
- Hébert, F. O., Phelps, L., Samonte, I., Panchal, M., Grambauer, S., Barber, I., Kalbe, M., Landry, C. R. and Aubin-Horth, N. (2015). Identification of candidate mimicry proteins involved in parasite-driven phenotypic changes. *Parasit. Vectors* **8**, 1.
- Hébert, F. O., Grambauer, S., Barber, I., Landry, C. R. and Aubin-Horth, N. (2017). Major host transitions are modulated through transcriptome-wide reprogramming events in *Schistocephalus solidus*, a threespine stickleback parasite. *Mol. Ecol.* **26**, 1118-1130.
- Hopkins, C. A. and Smyth, J. D. (1951). Notes on the morphology and life history of *Schistocephalus solidus* (Cestoda: Diphylobothriidae). *Parasitology* **41**, 283-291.
- Kliman, R. M. (2016). *Encyclopedia of Evolutionary Biology*. Oxford, UK: Academic Press.
- Lenth, R. V. (2016). Least-squares means: the R package lsmmeans. *J. Stat. Softw.* **69**, 1-33.
- Lobue, C. P. and Bell, M. A. (1993). Phenotypic manipulation by the cestode parasite *Schistocephalus solidus* of its intermediate host, *Gasterosteus aculeatus*, the threespine stickleback. *Am. Nat.* **142**, 725-735.
- Maximino, C., De Brito, T. M., Da Silva Batista, A. W., Herculano, A. M., Morato, S. and Gouveia, A. (2010). Measuring anxiety in zebrafish: a critical review. *Behav. Brain Res.* **214**, 157-171.
- Meakins, R. H. and Walkey, M. (1975). The effects of parasitism by the plerocercoid of *Schistocephalus solidus* Muller 1776 (Pseudophyllidea) on the respiration of the three-spined stickleback *Gasterosteus aculeatus* L. *J. Fish Biol.* **7**, 817-824.
- Milinski, M. (1985). Risk of predation of parasitized sticklebacks (*Gasterosteus aculeatus* L.) under competition for food. *Behaviour* **93**, 203-216.
- Mohammad, F., Aryal, S., Ho, J., Stewart, J. C., Norman, N. A., Tan, T. L., Eisaka, A. and Claridge-Chang, A. (2016). Ancient anxiety pathways influence *Drosophila* defense behaviors. *Curr. Biol.* **26**, 981-986.
- Moore, J. (1983). Responses of an avian predator and its isopod prey to an acanthocephalan parasite. *Ecology* **64**, 1000-1015.
- Ness, J. H. and Foster, S. A. (1999). Parasite-associated phenotype modifications in threespine stickleback. *Oikos* **85**, 127-134.
- Noldus, L. P. J. J., Spink, A. J. and Tegelenbosch, R. A. J. (2001). EthoVision: a versatile video tracking system for automation of behavioral experiments. *Behav. Res. Methods* **33**, 398-414.
- Øverli, Ø., Pall, M., Borg, B., Jobling, M. and Winberg, S. (2001). Effects of *Schistocephalus solidus* infection on brain monoaminergic activity in female three-spined sticklebacks *Gasterosteus aculeatus*. *Proc. R. Soc. B* **268**, 1411-1415.
- Pascoe, D. and Matthey, D. (1977). Dietary stress in parasitized and non-parasitized *Gasterosteus aculeatus* L. *Z. Parasitenkd.* **51**, 179-186.
- Poulin, R. (2001). Progenesis and reduced virulence as an alternative transmission strategy in a parasitic trematode. *Parasitology* **123**, 623-630.
- Poulin, R. (2007). Are there general laws in parasite ecology? *Parasitology* **134**, 763-776.
- Poulin, R. (2010). Parasite manipulation of host behavior: an update and frequently asked questions. *Adv. Study Behav.* **41**, 151-186.
- Poulin, R. and Thomas, F. (1999). Phenotypic variability induced by parasites: extent and evolutionary implications. *Parasitol. Today* **15**, 28-32.
- Quinn, T. P., Kendall, N. W., Rich, H. B., Jr and Chasco, B. E. (2012). Diel vertical movements, and effects of infection by the cestode *Schistocephalus solidus* on daytime proximity of three-spined sticklebacks *Gasterosteus aculeatus* to the surface of a large Alaskan lake. *Oecologia* **168**, 43-51.
- Ros, A. F. H., Vulliodu, P. and Bshary, R. (2012). Treatment with the glucocorticoid antagonist RU486 reduces cooperative cleaning visits of a common reef fish, the lined bristletooth. *Horm. Behav.* **61**, 37-43.
- Stumbo, A. D. and Poulin, R. (2016). Possible mechanism of host manipulation resulting from a diel behaviour pattern of eye-dwelling parasites? *Parasitology* **143**, 1261-1267.
- Talarico, M., Seifert, F., Lange, J., Sachser, N., Kurtz, J. and Scharack, J. P. (2017). Specific manipulation or systemic impairment? Behavioural changes of three-spined sticklebacks (*Gasterosteus aculeatus*) infected with the tapeworm *Schistocephalus solidus*. *Behav. Ecol. Sociobiol.* **71**, 36.
- Thomas, F., Adamo, S. and Moore, J. (2005). Parasitic manipulation: where are we and where should we go? *Behav. Processes* **68**, 185-199.
- Tierney, J. F., Huntingford, F. A. and Crompton, D. W. T. (1993). The relationship between infectivity of *Schistocephalus solidus* (Cestoda) and anti-predator behaviour of its intermediate host, the three-spined stickleback, *Gasterosteus aculeatus*. *Anim. Behav.* **46**, 603-605.
- Van Der Veer, H. W., Ellis, T., Miller, J. M., Pihl, L. and Rijnsdorp, A. D. (1997). Size-selective predation on juvenile North Sea flatfish and possible implications for recruitment. In *Early Life History and Recruitment in Fish Populations* (ed. R. C. Chambers and E. A. Trippel), pp. 279-303. Chapman & Hall Fish and Fisheries Series, vol 21. Dordrecht: Springer.
- Walkey, M. and Meakins, R. H. (1970). An attempt to balance the energy budget of a host-parasite system. *J. Fish Biol.* **2**, 361-372.
- Webster, M. M. and Laland, K. N. (2015). Space-use and sociability are not related to public-information use in ninespine sticklebacks. *Behav. Ecol. Sociobiol.* **69**, 895-907.
- Wesołowska, W. and Wesołowski, T. (2014). Do *Leucochloridium* sporocysts manipulate the behaviour of their snail hosts? *J. Zool.* **292**, 151-155.
- Wobbrock, J. O., Findlater, L., Gergle, D. and Higgins, J. J. (2011). The aligned rank transform for nonparametric factorial analyses using only ANOVA procedures. Proceedings of the SIGCHI conference on human factors in computing systems, 143-146.
- Wright, H. A., Wootton, R. J. and Barber, I. (2006). The effect of *Schistocephalus solidus* infection on meal size of three-spined stickleback. *J. Fish Biol.* **68**, 801-809.
